# Supplementary material
Source: HighWire-hosted journal article supplement (https://www.cancerbiomed.org/content/19/9/1334)
Supplement: media-1 [file media-1.pdf]

# Supplementary materials

## Doc S1: Supplementary materials and methods

**Table S1** Clinicopathological characteristics of cohort 1.

| Characteristics        | scRNA-seq  |                   | FACS        |               |
|------------------------|------------|-------------------|-------------|---------------|
|                        | HC         | HCC               | HC          | HCC           |
| Number of patients     | 3          | 4                 | 4           | 6             |
| Gender (male)          | 0          | 3 (75.0%)         | 3 (75.0%)   | 4 (66.7%)     |
| Age (years)            | 51.7 ± 2.5 | 58.0 ± 10.5       | 56.8 ± 5.6  | 53.8 ± 12.7   |
| Metastasis negative    | -          | 4 (100%)          | -           | 6 (100%)      |
| Capsule (+)            | -          | 4 (100%)          | -           | 5(83.3%)      |
| Ascites (+)            | -          | 1(25.0%)          | -           | 2(33.3%)      |
| Diameter of tumor (cm) | -          | 5.9 ± 4.1         | -           | 5.6 ± 2.3     |
| HBV-positive           | 1 (33.3%)  | 4(100%)           | 2 (50.0%)   | 6 (100%)      |
| HCV-negative           | 3 (100%)   | 4 (100%)          | 4 (100%)    | 6 (100%)      |
| ALT (U/L)              | 35.3 ± 5.4 | 66.0 ± 7.6        | 46.5 ± 28.3 | 38.0 ± 23.1   |
| AST (U/L)              | 31.3 ± 5.3 | 57.8 ± 12.5       | 31.8 ± 7.3  | 50.7 ± 31.2   |
| ALB (g/L)              | 42.5 ± 1.3 | 40.0 ± 2.5        | 41.5 ± 1.9  | 41.5 ± 9.6    |
| AFP (ng/mL)            | 3.4 ± 1.9  | 14252.2 ± 24523.5 | 3.9 ± 1.0   | 563.8 ± 986.4 |
| TBIL (μmol/L)          | 12.2 ± 3.0 | 22.3 ± 11.4       | 18.0 ± 8.8  | 20.9 ± 8.6    |

**Table S2** Details and characteristics of each patient enrolled in cohort 1.

| Patient ID | Gender | Age | Number   | ALT (IU/L) | AST (IU/L) | TBIL (μmol/L) | ALB (g/L) | AFP (ng/ml) | Tumor diameter (cm) | Tumor encapsulation | Ascites | HBV | Neoplasm histologic grade | TNM  | Lymph node meta-stasis | Tumors grow to hepatic vessels | Distant meta-stasis | Cancer type detailed             | Sample type | Tumors grow to nearby organs | Date of surgery | American Joint Committee on Cancer Publication version type | HCV |   |
|------------|--------|-----|----------|------------|------------|---------------|-----------|-------------|---------------------|---------------------|---------|-----|---------------------------|------|------------------------|--------------------------------|---------------------|----------------------------------|-------------|------------------------------|-----------------|-------------------------------------------------------------|-----|---|
| 101        | M      | 50  | 1        | 64         | 54         | 21.3          | 43.1      | 0.83        | 3                   | Y                   | Y       | Y   | 2-3                       | II   | N                      | Y                              | N                   | Hepatocellular carcinoma         | Primary     | N                            | 20180821        | Available                                                   | 7th | N |
| 102        | M      | 52  | 1        | 78         | 70         | 41.1          | 36.4      | 169.7       | 4                   | Y                   | N       | Y   | 2                         | II   | N                      | Y                              | N                   | Hepatocellular carcinoma         | Primary     | N                            | 20180531        | Unavailable                                                 | 7th | N |
| 103        | M      | 76  | Multiple | 65         | 39         | 12.1          | 41.5      | 110.3       | 3.5                 | Y                   | N       | Y   | 3                         | II   | N                      | N                              | N                   | Hepatocellular carcinoma         | Primary     | N                            | 20180523        | Unavailable                                                 | 7th | N |
| 104        | F      | 54  | Multiple | 57         | 68         | 14.6          | 39        | 567.28      | 13                  | Y                   | N       | Y   | 2                         | II   | N                      | Y                              | N                   | Hepatocellular carcinoma         | Primary     | N                            | 20180605        | Unavailable                                                 | 7th | N |
| 105        | F      | 49  |          | 31         | 31         | 10            | 42.7      | 1.96        |                     |                     | N       |     |                           |      |                        |                                |                     | Intrahepatic cholangio-lithiasis |             |                              | 20181009        | Unavailable                                                 |     | N |
| 106        | F      | 55  |          | 32         | 25         | 10.2          | 40.8      | none        |                     |                     | Y       |     |                           |      |                        |                                |                     | Polycystic liver                 |             |                              | 20180730        | Unavailable                                                 |     | N |
| 107        | F      | 51  |          | 43         | 38         | 16.4          | 43.9      | 4.75        |                     |                     | N       |     |                           |      |                        |                                |                     | Hepatic hemangioma               |             |                              | 20181010        | Unavailable                                                 |     | N |
| 108        | M      | 55  |          | 18         | 24         | 32.7          | 38.8      | 2.39        |                     |                     | Y       |     |                           |      |                        |                                |                     | Hepatic hemangioma               |             |                              | 20190122        | Unavailable                                                 |     | N |
| 109        | F      | 66  |          | 93         | 40         | 12.5          | 42.4      | 4.45        |                     |                     | N       |     |                           |      |                        |                                |                     | Hepatic hemangioma               |             |                              | 20190108        | Unavailable                                                 |     | N |
| 110        | M      | 66  | Multiple | 57         | 74         | 18.7          | 37.2      | 8.34        | 4                   | Y                   | N       | Y   | 2                         | II   | N                      | Y                              | N                   | Hepatocellular carcinoma         | Primary     | N                            | 20180810        | 7th                                                         | N   |   |
| 111        | M      | 66  | Multiple | 27         | 41         | 34.6          | 36.4      | 2531        | 10                  | Y                   | N       | Y   | 1                         | IIIB | N                      | Y                              | N                   | Hepatocellular carcinoma         | Primary     | N                            | 20181017        | 7th                                                         | N   |   |
| 112        | M      | 51  | Multiple | 20         | 25         | 30.67         | 62.1      | None        | 4.5                 | Y                   | Y       | Y   | 2-3                       | II   | N                      | Y                              | N                   | Hepatocellular carcinoma         | Primary     | N                            | 20180806        | 7th                                                         | N   |   |
| 113        | F      | 60  | 1        | 12         | 17         | 14.5          | 38.8      | 20.18       | 3                   | Y                   | N       | Y   | 2                         | I    | N                      | N                              | N                   | Hepatocellular carcinoma         | Primary     | N                            | 20190110        | 7th                                                         | N   |   |
| 114        | F      | 29  | 1        | 79         | 108        | 11.37         | 33        | 214.4       | 7                   | Y                   | N       | Y   | 1                         | I    | N                      | N                              | N                   | Hepatocellular carcinoma         | Primary     | N                            | 20190320        | 7th                                                         | N   |   |
| 115        | M      | 51  | Multiple | 33         | 39         | 15.77         | 41.6      | 45.32       | 5                   | N                   | Y       | Y   | 2                         | II   | N                      | Y                              | N                   | Hepatocellular carcinoma         | Primary     | N                            | 20190403        | 7th                                                         | N   |   |

FACS:

**Table S3** Summary of scRNA-seq data through 10x Genomics Cell Ranger software.

| Sample | Patient ID | Estimated number of cells | Mean reads per cell | Median genes per cell | Number of reads | Valid barcodes | Sequencing saturation | Q30 bases in barcode | Q30 bases in RNA read | Q30 bases in sample index | Q30 bases in UMI | Reads mapped to genome | Reads confidently mapped to intergenic regions | Reads confidently mapped to intronic regions | Reads confidently mapped to exonic regions | Reads mapped to antisense to gene | Fraction of reads in cells | Total genes detected | Median UMI counts per cell |       |
|--------|------------|---------------------------|---------------------|-----------------------|-----------------|----------------|-----------------------|----------------------|-----------------------|---------------------------|------------------|------------------------|------------------------------------------------|----------------------------------------------|--------------------------------------------|-----------------------------------|----------------------------|----------------------|----------------------------|-------|
| H1     | 105        | 14,847                    | 22,030              | 1,113                 | 327,093,834     | 96.90%         | 62.20%                | 97.20%               | 95.60%                | 96.80%                    | 96.80%           | 97.00%                 | 5.60%                                          | 35.20%                                       | 53.00%                                     | 49.30%                            | 1.50%                      | 88.30%               | 21,672                     | 3,107 |
| H2     | 107        | 17,880                    | 18,729              | 1,126                 | 334,892,012     | 97.30%         | 62.90%                | 97.20%               | 95.50%                | 96.20%                    | 96.80%           | 97.00%                 | 5.50%                                          | 33.50%                                       | 54.60%                                     | 50.80%                            | 1.40%                      | 91.80%               | 21,107                     | 2,759 |
| H3     | 106        | 16,978                    | 22,318              | 1,115                 | 378,926,046     | 97.10%         | 65.10%                | 97.30%               | 95.50%                | 95.40%                    | 96.80%           | 96.90%                 | 5.50%                                          | 37.10%                                       | 51.20%                                     | 47.80%                            | 1.40%                      | 93.80%               | 20,946                     | 2,935 |
| HCC1   | 102        | 18,140                    | 18,049              | 1,148                 | 327,422,737     | 97.20%         | 56.00%                | 97.20%               | 95.30%                | 95.50%                    | 96.80%           | 97.00%                 | 4.10%                                          | 36.70%                                       | 53.50%                                     | 49.90%                            | 1.30%                      | 93.60%               | 21,522                     | 2,876 |
| HCC2   | 103        | 10,264                    | 37,916              | 1,275                 | 389,173,298     | 97.20%         | 72.50%                | 97.20%               | 95.50%                | 96.10%                    | 96.80%           | 97.20%                 | 4.10%                                          | 28.00%                                       | 59.50%                                     | 56.20%                            | 1.20%                      | 95.50%               | 21,707                     | 3,481 |
| HCC3   | 104        | 16,030                    | 21,352              | 1,194                 | 342,273,029     | 97.00%         | 56.20%                | 97.30%               | 95.60%                | 94.80%                    | 96.80%           | 97.10%                 | 5.60%                                          | 36.60%                                       | 51.60%                                     | 48.10%                            | 1.40%                      | 92.30%               | 22,727                     | 3,372 |
| PT     | 101        | 10,135                    | 32,261              | 1,060                 | 326,968,777     | 96.90%         | 79.90%                | 96.80%               | 92.90%                | 95.70%                    | 96.50%           | 95.60%                 | 3.60%                                          | 25.20%                                       | 64.60%                                     | 60.80%                            | 1.20%                      | 93.00%               | 18,885                     | 2,888 |
| IT     | 101        | 10,771                    | 32,360              | 1,140                 | 348,551,458     | 97.00%         | 77.30%                | 96.70%               | 93.10%                | 92.60%                    | 96.40%           | 95.70%                 | 3.20%                                          | 23.60%                                       | 66.70%                                     | 62.90%                            | 1.10%                      | 93.10%               | 20,071                     | 3,283 |
| Blood  | 101        | 5,452                     | 59,452              | 1,186                 | 324,134,452     | 96.90%         | 87.50%                | 96.80%               | 92.60%                | 95.20%                    | 96.50%           | 95.50%                 | 3.60%                                          | 21.80%                                       | 68.00%                                     | 64.20%                            | 1.00%                      | 92.30%               | 18,279                     | 3,287 |

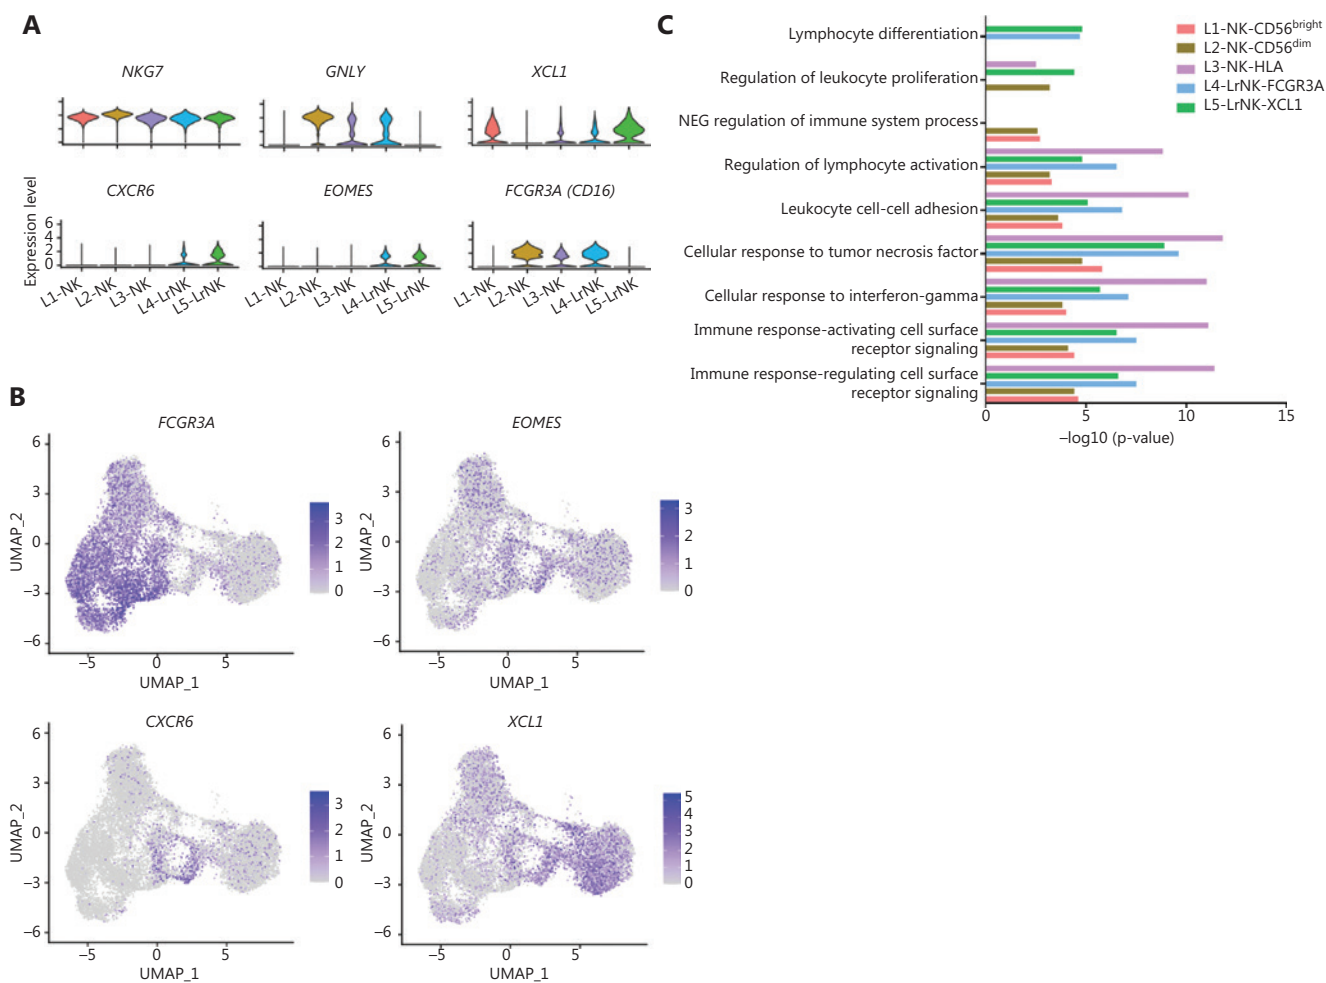

**Figure S1** Cluster characterization of NK cells in the liver. (A) Violin plots showing expression comparison of selected innate lymphoid cell markers in this scRNA-seq dataset. The violin represents the probability density at each value. (B) UMAP representation of gene expression for *FCGR3A*, *EOMES*, *CXCR6*, and *XCL1*. (C) Selected Gene Ontology terms using genes upregulated ( $\log_2$  fold-change > 0.25) within each subset with an adjusted  $P < 0.05$ .

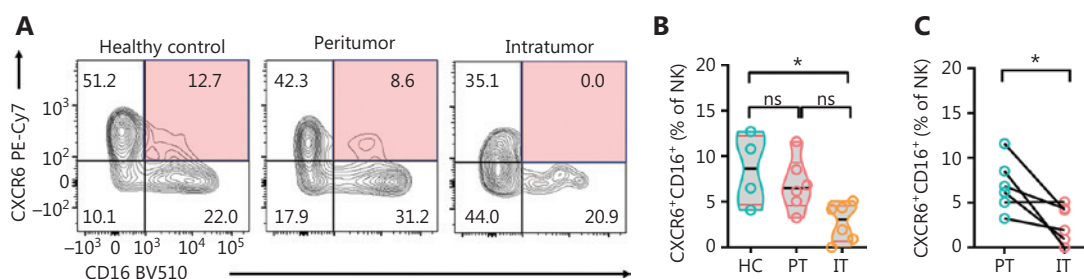

**Figure S2** Frequency of CXCR6<sup>+</sup>CD16<sup>+</sup> NK cells infiltrating healthy liver (HC,  $n = 4$ ), HCC tumor-adjacent liver tissues (PT,  $n = 6$ ), and HCC tumors (IT,  $n = 6$ ). (A) Representative FACS plots for CXCR6<sup>+</sup>CD16<sup>+</sup> cell expression among total NK cells from the normal liver as well as IT and PT from 1 patient with HCC. (B) Cumulative percentages of CXCR6<sup>+</sup>CD16<sup>+</sup> NK cells in the normal liver as well as IT and PT. (C) Percentages of CXCR6<sup>+</sup>CD16<sup>+</sup> NK cells from paired IT and PT of patients with HCC in cohort 1. One-way ANOVA test (B) and paired  $t$  test (C) were applied. Nonsignificant (ns)  $P > 0.05$ ;  $*P < 0.05$ .

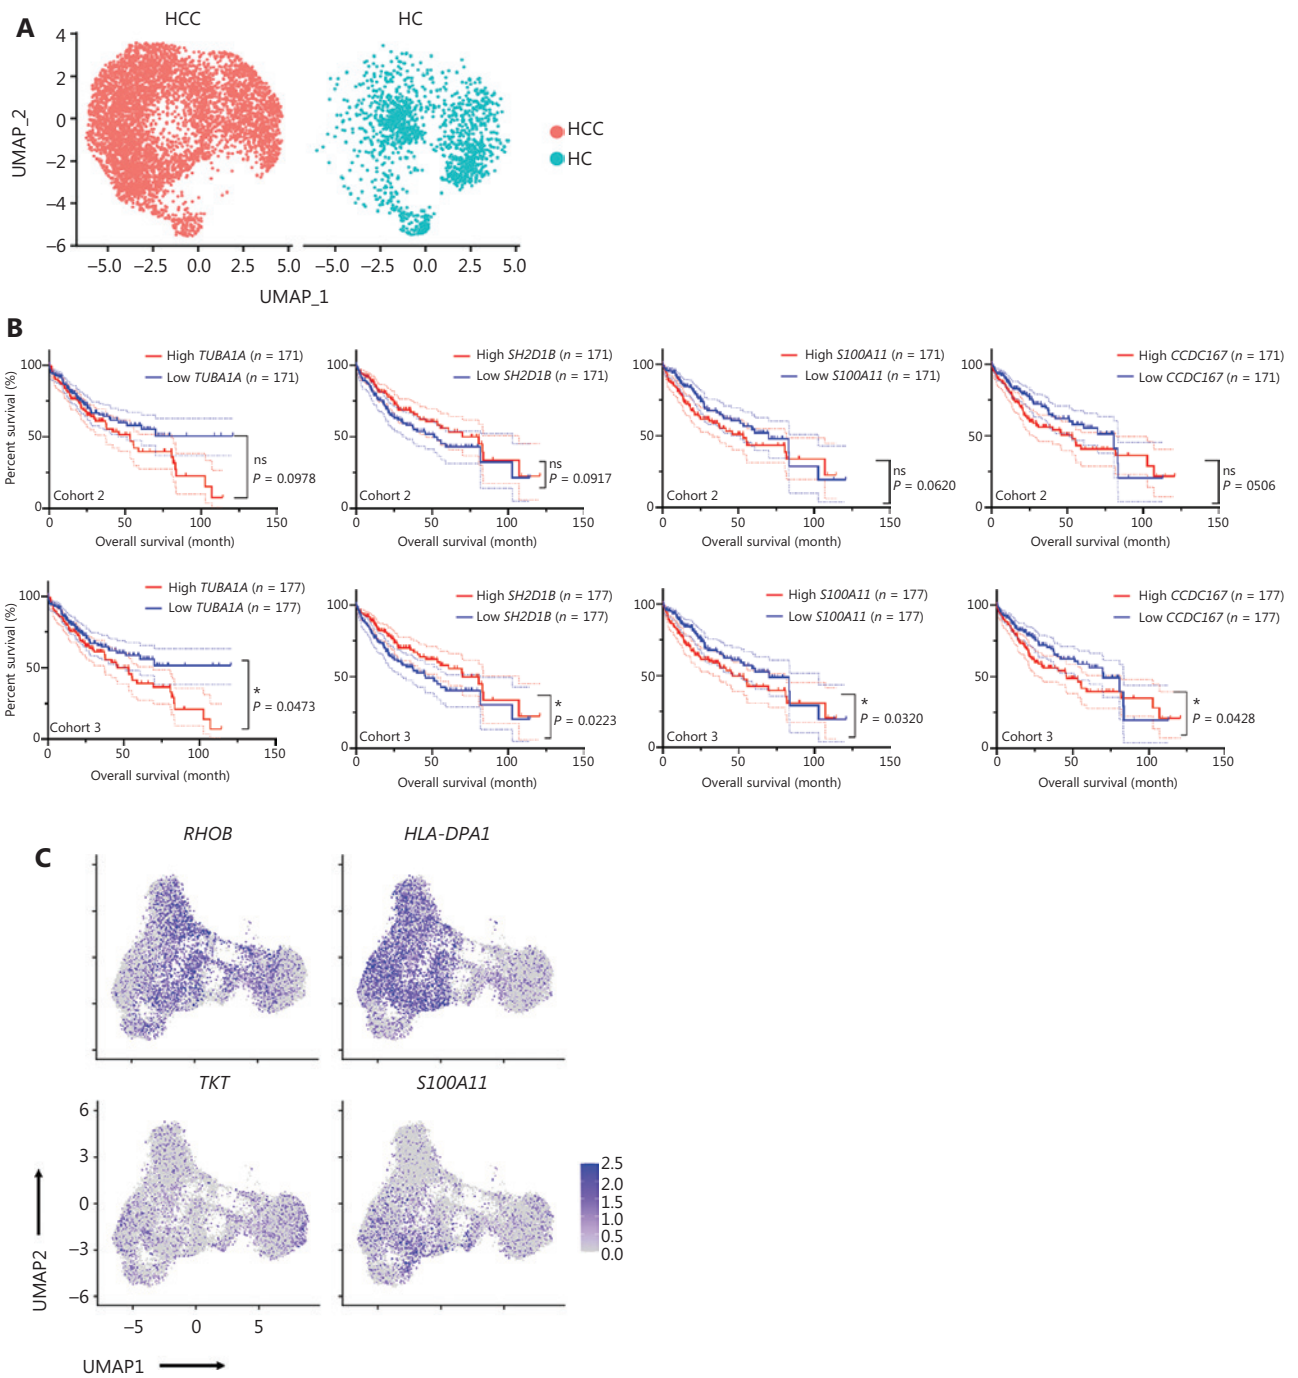

**Figure S3** Cluster characterization of NK cells in the blood and IT. (A) UMAP plot of 6,182 human blood NK cells from 1 patient with HCC and a healthy donor. (B) Kaplan–Meier survival curves for the duration of overall survival (OS) in months, according to the gene expression levels of *TUBA1A*, *SH2D1B*, *S100A11*, and *CCDC167* in IT of patients with HCC from cohort 2 and cohort 3 (high densities, red line; low densities, blue line) (log-rank test). Nonsignificant (ns)  $P > 0.05$ ;  $*P < 0.05$ . (C) UMAP representation of gene expression for *RHOB*, *HLA-DPA1*, *TKT*, and *S100A11*.

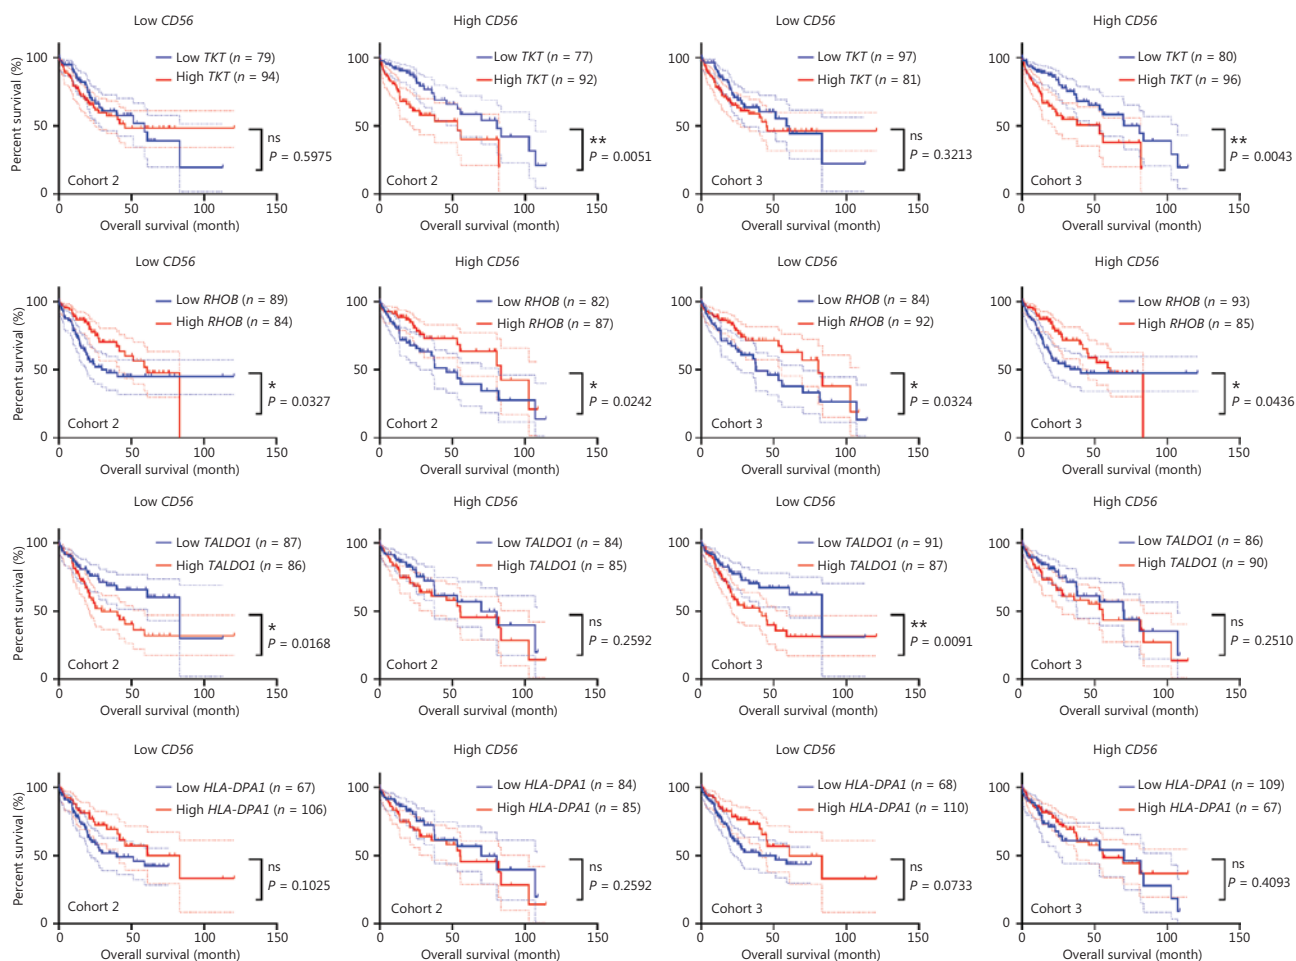

**Figure S4** Correlation of *TKT*, *RHOB*, *TALDO1*, and *HLA-DPA1* expression levels depending on the calculated level of NK cell infiltration with the survival of patients with HCC. All patients in TCGA cohort 2 and cohort 3 were divided according to the expression levels of *TKT*, *RHOB*, *TALDO1*, and *HLA-DPA1* (higher or lower than the median expression value for all patients). The associations between *TKT*, *RHOB*, *TALDO1*, and *HLA-DPA1* expression level and survival are shown for patients whose tumors had higher (above the median) or lower (below the median) expression of *CD56* (log-rank test). Nonsignificant (ns)  $P > 0.05$ ; \* $P < 0.05$ ; \*\* $P < 0.01$ .
